# Supplementary material for: Solubility of polymorphic glycine in mixed solutions with molecular dynamics simulation and thermodynamic analysis
Source: Royal Society of Chemistry journal article supplement (doi:10.1039/d5ce00018a), 2025-01-01
Supplement: d5ce00018a1.pdf [file d5ce00018a1.pdf]

# Solubility of polymorphic glycine in mixed solutions with molecular dynamic simulation and thermodynamic analysis.

Zhihao Wang,<sup>ab</sup> Yixin Ma,<sup>ab</sup> Yan Zhang,<sup>\*ab</sup> Li Yang,<sup>a</sup>

Songlin Zheng<sup>c</sup>, Jingcai Cheng,<sup>\*a</sup> and Chao Yang<sup>ab</sup>

<sup>a</sup> CAS Key Laboratory of Green process and Engineering, State Key Laboratory of Petroleum Molecular & Process Engineering, Institute of Process Engineering, Chinese Academy of Sciences, Beijing 100190, China.

<sup>b</sup> School of Chemical Engineering, University of Chinese Academy of Sciences, Beijing 100049, China.

<sup>c</sup> Hubei Trisun Chemicals Co., Ltd., Hubei Yichang 443000, China

## 1. Details of the Chemicals

Table S1 Details of the Chemicals used in this study.

| Chemicals              | CAS number | Chemical formula                              | Source                       | Purity |
|------------------------|------------|-----------------------------------------------|------------------------------|--------|
| Glycine                | 56-40-6    | C <sub>2</sub> H <sub>5</sub> NO <sub>2</sub> | Shanghai Aladdin Biochemical | ≥0.990 |
| Ammonium Chloride      | 12125-02-9 | NH <sub>4</sub> Cl                            | Shanghai Aladdin Biochemical | ≥0.995 |
| Hexamethylenetetramine | 100-97-0   | C <sub>6</sub> H <sub>12</sub> N <sub>4</sub> | Shanghai Aladdin Biochemical | ≥0.995 |
| Sodium Chloride        | 67-56-1    | CH <sub>4</sub> O                             | Shanghai Macklin Biochemical | ≥0.995 |

## 2. Infrared spectra and PLS calibration

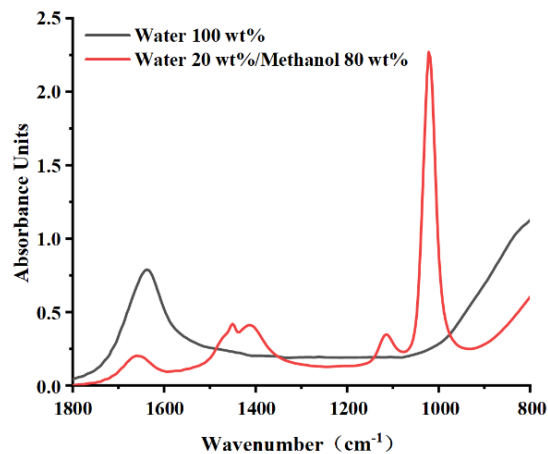

Fig. S1 Infrared spectra of the water and ethanol.

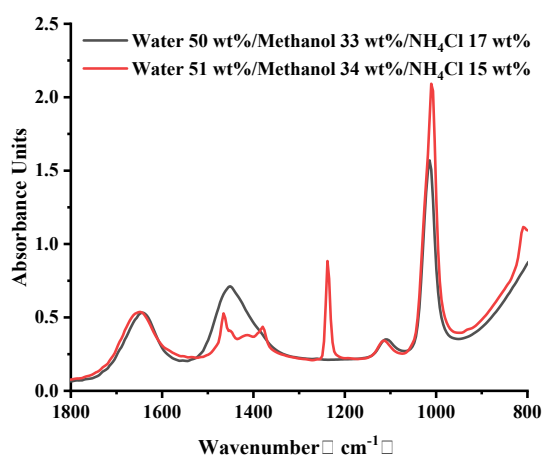

Fig. S2 Infrared spectra of the water-methanol-NH<sub>4</sub>Cl and water-methanol-HMTA.

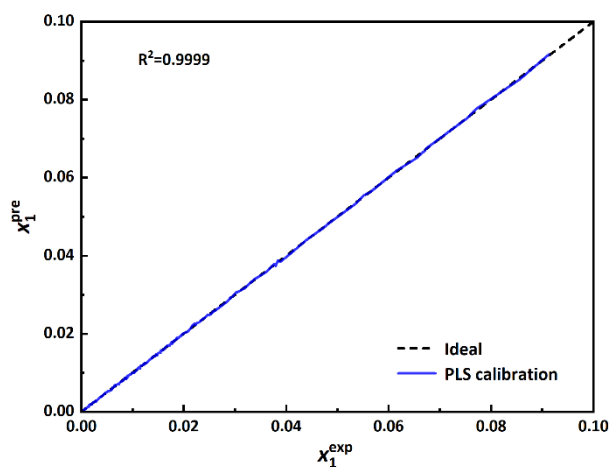

Fig. S3 Predicted versus experimental value of glycine for the training set ( $x_1$  represents the mole fraction of glycine in the mixture).

### 3. Solubility data of polymorphic glycine

Table S2 Mole fraction solubility of  $\alpha$ -form glycine ( $x_1$ ) in water ( $x_2$ )-methanol ( $x_3$ ) binary solvent mixtures at temperatures from 293.15 K to 333.15 K ( $p = 0.1$  MPa).

| $x_3$        | $10^3 x_1^{exp}$ | Apelbat<br>$10^3 x_1^{cal}$ | $\lambda h$<br>$10^3 x_1^{cal}$ | NRTL<br>$10^3 x_1^{cal}$ |
|--------------|------------------|-----------------------------|---------------------------------|--------------------------|
| $T=293.15$ K |                  |                             |                                 |                          |
| 0.00         | 50.08            | 50.13                       | 50.41                           | 51.01                    |
| 0.058        | 32.59            | 32.61                       | 33.05                           | 33.51                    |
| 0.13         | 20.63            | 20.66                       | 20.75                           | 20.63                    |
| 0.27         | 7.34             | 7.33                        | 7.34                            | 7.52                     |
| 0.46         | 2.21             | 2.22                        | 2.23                            | 2.27                     |
| 0.69         | 0.64             | 0.63                        | 0.62                            | 0.54                     |
| $T=303.15$ K |                  |                             |                                 |                          |
| 0.00         | 61.80            | 61.62                       | 61.09                           | 61.52                    |
| 0.058        | 43.00            | 42.91                       | 42.57                           | 43.02                    |
| 0.13         | 28.46            | 28.37                       | 27.98                           | 27.83                    |
| 0.27         | 10.20            | 10.29                       | 10.26                           | 10.13                    |
| 0.46         | 3.22             | 3.21                        | 3.15                            | 3.11                     |
| 0.69         | 0.75             | 0.80                        | 0.82                            | 0.75                     |
| $T=313.15$ K |                  |                             |                                 |                          |
| 0.00         | 73.55            | 73.73                       | 72.97                           | 72.88                    |
| 0.058        | 54.21            | 54.35                       | 53.81                           | 53.78                    |
| 0.13         | 37.47            | 37.45                       | 36.93                           | 36.75                    |
| 0.27         | 14.28            | 14.07                       | 14.02                           | 13.89                    |
| 0.46         | 4.44             | 4.43                        | 4.36                            | 4.23                     |
| 0.69         | 1.08             | 1.04                        | 1.06                            | 1.04                     |
| $T=323.15$ K |                  |                             |                                 |                          |
| 0.00         | 86.17            | 86.14                       | 86.03                           | 85.59                    |
| 0.058        | 66.59            | 66.50                       | 66.86                           | 65.99                    |
| 0.13         | 47.51            | 47.70                       | 47.79                           | 47.39                    |
| 0.27         | 18.54            | 18.75                       | 18.77                           | 18.53                    |
| 0.46         | 5.83             | 5.86                        | 5.90                            | 5.67                     |
| 0.69         | 1.37             | 1.36                        | 1.35                            | 1.40                     |
| $T=333.15$ K |                  |                             |                                 |                          |
| 0.00         | 98.53            | 98.51                       | 100.19                          | 99.38                    |
| 0.058        | 78.91            | 78.93                       | 81.74                           | 79.03                    |
| 0.13         | 58.99            | 58.87                       | 60.71                           | 60.08                    |
| 0.27         | 24.52            | 24.45                       | 24.65                           | 25.13                    |
| 0.46         | 7.46             | 7.44                        | 7.83                            | 7.53                     |
| 0.69         | 1.78             | 1.80                        | 1.69                            | 1.87                     |

$x_3$  is the initial mole fraction of methanol in the (water-methanol) binary solvent mixtures;  $x_1^{exp}$  is

the experimentally determined solubility of  $\alpha$ -form Glycine;  $x_1^{cal}$  is the calculated solubility by the

modified Apelblat model (Eq. (5)), the  $\lambda h$  (Eq. (6)) and the NRTL model (Eq. (7)), respectively.

Table S3 Mole fraction solubility of  $\gamma$ -form glycine ( $x_1$ ) in water ( $x_2$ )-methanol ( $x_3$ ) binary solvent mixtures at temperatures from 293.15 K to 333.15 K ( $p = 0.1$  MPa).

| $x_3$              | $10^3 x_1^{exp}$ | Apelbat<br>$10^3 x_1^{cal}$ | $\lambda h$<br>$10^3 x_1^{cal}$ | NRTL<br>$10^3 x_1^{cal}$ |
|--------------------|------------------|-----------------------------|---------------------------------|--------------------------|
| <i>T</i> =293.15 K |                  |                             |                                 |                          |
| 0.00               | 47.63            | 47.60                       | 47.91                           | 48.17                    |
| 0.058              | 31.33            | 31.33                       | 31.57                           | 32.30                    |
| 0.13               | 20.22            | 20.27                       | 20.41                           | 20.31                    |
| 0.27               | 7.29             | 7.19                        | 7.21                            | 7.53                     |
| 0.46               | 2.13             | 2.12                        | 2.12                            | 2.21                     |
| 0.69               | 0.50             | 0.51                        | 0.50                            | 0.44                     |
| <i>T</i> =303.15 K |                  |                             |                                 |                          |
| 0.00               | 58.53            | 58.66                       | 58.20                           | 58.20                    |
| 0.058              | 41.10            | 41.16                       | 40.70                           | 41.29                    |
| 0.13               | 28.07            | 27.88                       | 27.49                           | 27.37                    |
| 0.27               | 9.59             | 9.94                        | 9.97                            | 9.91                     |
| 0.46               | 2.92             | 2.97                        | 2.98                            | 2.95                     |
| 0.69               | 0.70             | 0.66                        | 0.68                            | 0.60                     |
| <i>T</i> =313.15 K |                  |                             |                                 |                          |
| 0.00               | 70.61            | 70.36                       | 69.69                           | 69.60                    |
| 0.058              | 52.36            | 52.14                       | 51.48                           | 51.88                    |
| 0.13               | 36.70            | 36.77                       | 36.26                           | 35.87                    |
| 0.27               | 13.82            | 13.48                       | 13.48                           | 13.64                    |
| 0.46               | 4.15             | 4.09                        | 4.09                            | 3.99                     |
| 0.69               | 0.85             | 0.87                        | 0.90                            | 0.80                     |
| <i>T</i> =323.15 K |                  |                             |                                 |                          |
| 0.00               | 82.19            | 82.39                       | 82.33                           | 81.87                    |
| 0.058              | 63.65            | 63.93                       | 64.02                           | 63.37                    |
| 0.13               | 46.50            | 46.70                       | 46.88                           | 46.10                    |
| 0.27               | 18.04            | 17.97                       | 17.88                           | 18.13                    |
| 0.46               | 5.55             | 5.54                        | 5.52                            | 5.32                     |
| 0.69               | 1.16             | 1.18                        | 1.18                            | 1.06                     |
| <i>T</i> =333.15 K |                  |                             |                                 |                          |
| 0.00               | 94.49            | 94.43                       | 96.09                           | 95.61                    |
| 0.058              | 76.27            | 76.16                       | 78.34                           | 76.41                    |
| 0.13               | 57.51            | 57.36                       | 59.51                           | 58.15                    |
| 0.27               | 23.43            | 23.59                       | 23.28                           | 24.14                    |
| 0.46               | 7.38             | 7.40                        | 7.30                            | 7.10                     |
| 0.69               | 1.66             | 1.64                        | 1.52                            | 1.42                     |

$x_3$  is the initial mole fraction of methanol in the (water-methanol) binary solvent mixtures;  $x_1^{exp}$  is

the experimentally determined solubility of  $\gamma$ -form glycine;  $x_1^{cal}$  is the calculated solubility by the

modified Apelbat model (Eq. (5)), the  $\lambda h$  (Eq. (6)) and the NRTL model (Eq. (7)), respectively.

Table S4 Mole fraction solubility of  $\alpha$ -form glycine ( $x_1$ ) in water ( $x_2$ )-methanol ( $x_3$ )- $\text{NH}_4\text{Cl}$  ( $x_4$ ) ternary solvent mixtures at temperatures from 293.15 K to 333.15 K ( $p = 0.1$  MPa).

| $x_4$        | $10^3 x_1^{exp}$ | Apelbat<br>$10^3 x_1^{cal}$ | $\lambda h$<br>$10^3 x_1^{cal}$ | NRTL<br>$10^3 x_1^{cal}$ |
|--------------|------------------|-----------------------------|---------------------------------|--------------------------|
| $T=293.15$ K |                  |                             |                                 |                          |
| 0.020        | 11.50            | 11.38                       | 11.43                           | 11.95                    |
| 0.030        | 12.75            | 12.72                       | 12.74                           | 13.48                    |
| 0.039        | 13.79            | 13.94                       | 13.98                           | 14.72                    |
| 0.049        | 15.36            | 15.36                       | 15.41                           | 16.15                    |
| 0.058        | 16.46            | 16.48                       | 16.56                           | 17.27                    |
| 0.067        | 18.22            | 18.24                       | 18.28                           | 18.56                    |
| $T=303.15$ K |                  |                             |                                 |                          |
| 0.020        | 14.74            | 15.23                       | 15.18                           | 15.26                    |
| 0.030        | 16.98            | 17.08                       | 17.06                           | 17.40                    |
| 0.039        | 19.26            | 18.80                       | 18.57                           | 19.32                    |
| 0.049        | 20.43            | 20.43                       | 20.32                           | 20.76                    |
| 0.058        | 22.07            | 22.04                       | 21.85                           | 22.21                    |
| 0.067        | 23.79            | 23.73                       | 23.65                           | 23.60                    |
| $T=313.15$ K |                  |                             |                                 |                          |
| 0.020        | 20.59            | 19.87                       | 19.78                           | 20.50                    |
| 0.030        | 22.46            | 22.43                       | 22.39                           | 22.71                    |
| 0.039        | 24.22            | 24.44                       | 24.19                           | 24.59                    |
| 0.049        | 26.44            | 26.43                       | 26.28                           | 26.66                    |
| 0.058        | 28.62            | 28.53                       | 28.27                           | 28.46                    |
| 0.067        | 30.15            | 30.15                       | 30.05                           | 29.87                    |
| $T=323.15$ K |                  |                             |                                 |                          |
| 0.020        | 25.00            | 25.35                       | 25.32                           | 26.07                    |
| 0.030        | 29.00            | 28.86                       | 28.85                           | 29.63                    |
| 0.039        | 30.36            | 30.81                       | 30.95                           | 31.45                    |
| 0.049        | 33.33            | 33.36                       | 33.40                           | 34.05                    |
| 0.058        | 35.65            | 35.87                       | 35.95                           | 36.04                    |
| 0.067        | 37.43            | 37.53                       | 37.56                           | 37.62                    |
| $T=333.15$ K |                  |                             |                                 |                          |
| 0.020        | 31.73            | 31.70                       | 31.89                           | 34.11                    |
| 0.030        | 36.37            | 36.47                       | 36.55                           | 38.33                    |
| 0.039        | 38.11            | 37.75                       | 38.95                           | 40.43                    |
| 0.049        | 41.19            | 41.18                       | 41.76                           | 43.22                    |
| 0.058        | 44.04            | 43.93                       | 44.96                           | 45.55                    |
| 0.067        | 45.89            | 45.82                       | 46.25                           | 47.18                    |

$x_4$  is the initial mole fraction of  $\text{NH}_4\text{Cl}$  in the (water-methanol- $\text{NH}_4\text{Cl}$ ) ternary solvent mixtures;

$x_1^{exp}$  is the experimentally determined solubility of  $\alpha$ -form glycine;  $x_1^{cal}$  is the calculated solubility by the modified Apelbat model (Eq. (5)), the  $\lambda h$  (Eq. (6)) and the NRTL model (Eq. (7)), respectively.

Table S5 Mole fraction solubility of  $\gamma$ -form glycine ( $x_1$ ) in water ( $x_2$ )-methanol ( $x_3$ )- $\text{NH}_4\text{Cl}$  ( $x_4$ ) ternary solvent mixtures at temperatures from 293.15 K to 333.15 K ( $p = 0.1$  MPa).

| $x_4$              | $10^3 x_1^{exp}$ | Apelbat<br>$10^3 x_1^{cal}$ | $\lambda h$<br>$10^3 x_1^{cal}$ | NRTL<br>$10^3 x_1^{cal}$ |
|--------------------|------------------|-----------------------------|---------------------------------|--------------------------|
| <i>T</i> =293.15 K |                  |                             |                                 |                          |
| 0.020              | 10.43            | 10.43                       | 10.47                           | 10.85                    |
| 0.030              | 11.69            | 11.71                       | 11.79                           | 12.32                    |
| 0.039              | 13.46            | 13.45                       | 13.49                           | 13.88                    |
| 0.049              | 15.14            | 15.15                       | 15.15                           | 15.48                    |
| 0.058              | 15.72            | 15.75                       | 15.82                           | 16.56                    |
| 0.067              | 17.50            | 17.49                       | 17.51                           | 18.03                    |
| <i>T</i> =303.15 K |                  |                             |                                 |                          |
| 0.020              | 14.27            | 14.30                       | 14.21                           | 14.42                    |
| 0.030              | 16.43            | 16.37                       | 16.14                           | 16.44                    |
| 0.039              | 17.87            | 17.91                       | 17.83                           | 18.02                    |
| 0.049              | 19.90            | 19.87                       | 19.85                           | 19.91                    |
| 0.058              | 21.18            | 21.08                       | 20.90                           | 21.33                    |
| 0.067              | 22.73            | 22.76                       | 22.73                           | 22.81                    |
| <i>T</i> =313.15 K |                  |                             |                                 |                          |
| 0.020              | 19.09            | 19.00                       | 18.88                           | 19.20                    |
| 0.030              | 21.95            | 21.92                       | 21.62                           | 21.76                    |
| 0.039              | 23.35            | 23.24                       | 23.13                           | 23.46                    |
| 0.049              | 25.54            | 25.56                       | 25.54                           | 25.55                    |
| 0.058              | 27.28            | 27.32                       | 27.08                           | 27.26                    |
| 0.067              | 29.04            | 29.03                       | 28.98                           | 28.89                    |
| <i>T</i> =323.15 K |                  |                             |                                 |                          |
| 0.020              | 24.43            | 24.55                       | 24.61                           | 25.18                    |
| 0.030              | 28.09            | 28.26                       | 28.39                           | 28.41                    |
| 0.039              | 29.35            | 29.47                       | 29.49                           | 30.13                    |
| 0.049              | 32.30            | 32.30                       | 32.30                           | 32.72                    |
| 0.058              | 34.28            | 34.40                       | 34.47                           | 34.61                    |
| 0.067              | 36.37            | 36.34                       | 36.34                           | 36.43                    |
| <i>T</i> =333.15 K |                  |                             |                                 |                          |
| 0.020              | 30.99            | 30.94                       | 31.53                           | 32.98                    |
| 0.030              | 35.33            | 35.23                       | 36.60                           | 36.84                    |
| 0.039              | 36.62            | 36.58                       | 36.98                           | 38.64                    |
| 0.049              | 40.19            | 40.18                       | 40.21                           | 41.67                    |
| 0.058              | 42.32            | 42.23                       | 43.17                           | 43.66                    |
| 0.067              | 44.73            | 44.75                       | 44.88                           | 45.65                    |

$x_4$  is the initial mole fraction of  $\text{NH}_4\text{Cl}$  in the (water–methanol– $\text{NH}_4\text{Cl}$ ) ternary solvent mixtures;  $x_1^{exp}$  is the experimentally determined solubility of  $\alpha$ -form glycine;  $x_1^{cal}$  is the calculated solubility by the modified Apelblat model (Eq. (5)), the  $\lambda h$  (Eq. (6)) and the NRTL model (Eq. (7)), respectively.

Table S6 Mole fraction solubility of  $\alpha$ -form Glycine ( $x_1$ ) in water ( $x_2$ )-methanol ( $x_3$ )-HMTA ( $x_4$ ) ternary solvent mixtures at temperatures from 293.15 K to 333.15 K ( $p = 0.1$  MPa).

| $x_4$              | $10^3 x_1^{exp}$ | Apelbat<br>$10^3 x_1^{cal}$ | $\lambda h$<br>$10^3 x_1^{cal}$ | NRTL<br>$10^3 x_1^{cal}$ |
|--------------------|------------------|-----------------------------|---------------------------------|--------------------------|
| <i>T</i> =293.15 K |                  |                             |                                 |                          |
| 0.005              | 7.03             | 7.05                        | 7.03                            | 7.27                     |
| 0.010              | 6.51             | 6.53                        | 6.51                            | 6.72                     |
| 0.015              | 5.81             | 5.84                        | 5.84                            | 6.14                     |
| 0.020              | 5.52             | 5.54                        | 5.51                            | 5.71                     |
| 0.025              | 5.12             | 5.11                        | 5.10                            | 5.27                     |
| 0.030              | 4.51             | 4.53                        | 4.51                            | 4.80                     |
| <i>T</i> =303.15 K |                  |                             |                                 |                          |
| 0.005              | 9.91             | 9.85                        | 9.89                            | 9.93                     |
| 0.010              | 9.26             | 9.17                        | 9.20                            | 9.20                     |
| 0.015              | 8.37             | 8.29                        | 8.31                            | 8.42                     |
| 0.020              | 7.79             | 7.73                        | 7.82                            | 7.79                     |
| 0.025              | 7.16             | 7.22                        | 7.26                            | 7.17                     |
| 0.030              | 6.48             | 6.42                        | 6.47                            | 6.57                     |
| <i>T</i> =313.15 K |                  |                             |                                 |                          |
| 0.005              | 13.52            | 13.52                       | 13.59                           | 13.56                    |
| 0.010              | 12.57            | 12.64                       | 12.70                           | 12.53                    |
| 0.015              | 11.49            | 11.51                       | 11.56                           | 11.49                    |
| 0.020              | 10.68            | 10.72                       | 10.86                           | 10.62                    |
| 0.025              | 10.20            | 10.04                       | 10.10                           | 9.93                     |
| 0.030              | 8.98             | 8.99                        | 9.07                            | 8.98                     |
| <i>T</i> =323.15 K |                  |                             |                                 |                          |
| 0.005              | 18.17            | 18.28                       | 18.28                           | 18.58                    |
| 0.010              | 17.10            | 17.16                       | 17.16                           | 17.26                    |
| 0.015              | 15.56            | 15.68                       | 15.73                           | 15.76                    |
| 0.020              | 14.74            | 14.80                       | 14.75                           | 14.69                    |
| 0.025              | 13.60            | 13.77                       | 13.74                           | 13.52                    |
| 0.030              | 12.32            | 12.44                       | 12.43                           | 12.34                    |
| <i>T</i> =333.15 K |                  |                             |                                 |                          |
| 0.005              | 24.44            | 24.36                       | 24.14                           | 25.73                    |
| 0.010              | 23.03            | 22.96                       | 22.75                           | 23.92                    |
| 0.015              | 21.05            | 20.96                       | 20.99                           | 21.83                    |
| 0.020              | 20.42            | 20.36                       | 19.66                           | 20.65                    |
| 0.025              | 18.68            | 18.62                       | 18.33                           | 18.87                    |

0.030                      17.13                      17.04                      16.71                      17.28

$x_4$  is the initial mole fraction of HMTA in the (water-methanol-HMTA ternary solvent mixtures);  $x_1^{exp}$  is the experimentally determined solubility of  $\alpha$ -form Glycine;  $x_1^{cal}$  is the calculated solubility by the modified Apelblat model (Eq. (5)), the  $\lambda h$  (Eq. (6)) and the NRTL model (Eq. (7)), respectively.

Table S7 Mole fraction solubility of  $\gamma$ -form Glycine ( $x_1$ ) in water ( $x_2$ )-methanol ( $x_3$ )-HMTA ( $x_4$ ) ternary solvent mixtures at temperatures from 293.15 K to 333.15 K ( $p = 0.1$  MPa).

| $x_4$              | $10^3 x_1^{exp}$ | Apelbat<br>$10^3 x_1^{cal}$ | $\lambda h$<br>$10^3 x_1^{cal}$ | NRTL<br>$10^3 x_1^{cal}$ |
|--------------------|------------------|-----------------------------|---------------------------------|--------------------------|
| <i>T</i> =293.15 K |                  |                             |                                 |                          |
| 0.005              | 6.43             | 6.48                        | 6.46                            | 6.92                     |
| 0.010              | 5.95             | 5.96                        | 5.94                            | 6.27                     |
| 0.015              | 5.47             | 5.49                        | 5.47                            | 5.67                     |
| 0.020              | 4.89             | 4.91                        | 4.88                            | 5.10                     |
| 0.025              | 4.64             | 4.66                        | 4.60                            | 4.65                     |
| 0.030              | 4.23             | 4.25                        | 4.23                            | 4.20                     |
| <i>T</i> =303.15 K |                  |                             |                                 |                          |
| 0.005              | 9.42             | 9.26                        | 9.26                            | 9.57                     |
| 0.010              | 8.52             | 8.46                        | 8.54                            | 8.66                     |
| 0.015              | 7.88             | 7.84                        | 7.87                            | 7.90                     |
| 0.020              | 7.11             | 7.04                        | 7.08                            | 7.16                     |
| 0.025              | 6.48             | 6.41                        | 6.58                            | 6.52                     |
| 0.030              | 6.20             | 6.14                        | 6.15                            | 6.02                     |
| <i>T</i> =313.15 K |                  |                             |                                 |                          |
| 0.005              | 12.92            | 12.93                       | 12.97                           | 13.06                    |
| 0.010              | 11.75            | 11.88                       | 11.98                           | 11.88                    |
| 0.015              | 11.01            | 11.00                       | 11.06                           | 10.96                    |
| 0.020              | 9.91             | 9.95                        | 10.03                           | 9.95                     |
| 0.025              | 8.93             | 8.95                        | 9.18                            | 9.07                     |
| 0.030              | 8.71             | 8.71                        | 8.73                            | 8.49                     |
| <i>T</i> =323.15 K |                  |                             |                                 |                          |
| 0.005              | 17.37            | 17.70                       | 17.76                           | 17.82                    |
| 0.010              | 16.62            | 16.50                       | 16.45                           | 16.65                    |
| 0.015              | 15.08            | 15.19                       | 15.19                           | 15.17                    |
| 0.020              | 13.83            | 13.91                       | 13.87                           | 13.91                    |
| 0.025              | 12.54            | 12.66                       | 12.54                           | 12.72                    |
| 0.030              | 11.96            | 12.10                       | 12.11                           | 11.89                    |
| <i>T</i> =333.15 K |                  |                             |                                 |                          |
| 0.005              | 23.35            | 23.81                       | 23.83                           | 24.91                    |
| 0.010              | 22.64            | 22.68                       | 22.12                           | 23.15                    |
| 0.015              | 20.76            | 20.68                       | 20.44                           | 21.20                    |
| 0.020              | 19.31            | 19.23                       | 18.80                           | 19.60                    |



|       |       |       |       |       |
|-------|-------|-------|-------|-------|
| 0.025 | 18.18 | 18.09 | 16.80 | 18.26 |
| 0.030 | 16.62 | 16.53 | 16.44 | 16.77 |

$x_4$  is the initial mole fraction of HMTA in the (methanol-water-HMTA ternary solvent mixtures;  $x_1^{exp}$  is the experimentally determined solubility of  $\gamma$ -form Glycine;  $x_1^{cal}$  is the calculated solubility by the modified Apelblat model (Eq. (5)), the  $\lambda h$  (Eq. (6)) and the NRTL model (Eq. (7)), respectively.

#### 4. Molecular dynamics simulation under different simulation times

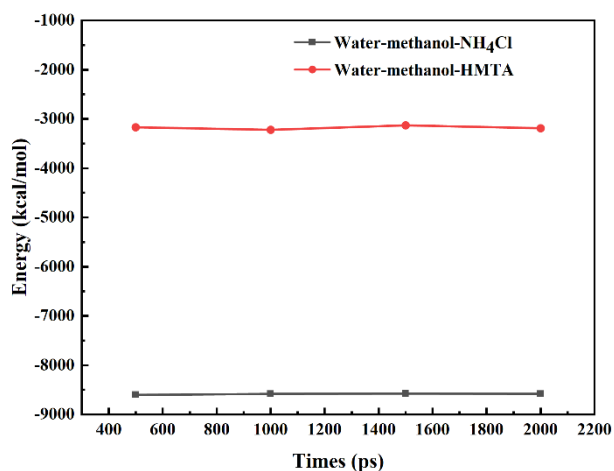

Fig. S4 The energy of impurity containing system under different molecular dynamics simulation time

#### 5. van't Hoff plot of $\ln x_1$ versus $(1/T-1/T_{hm})$ in mixed solutions

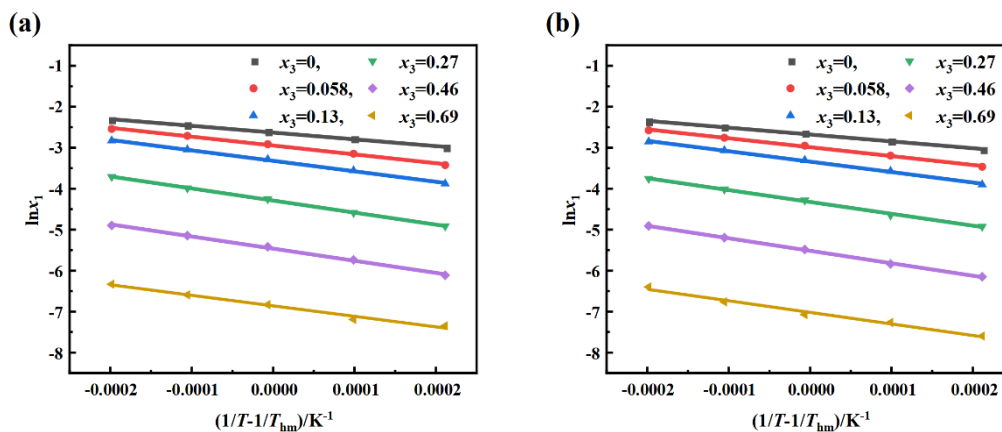

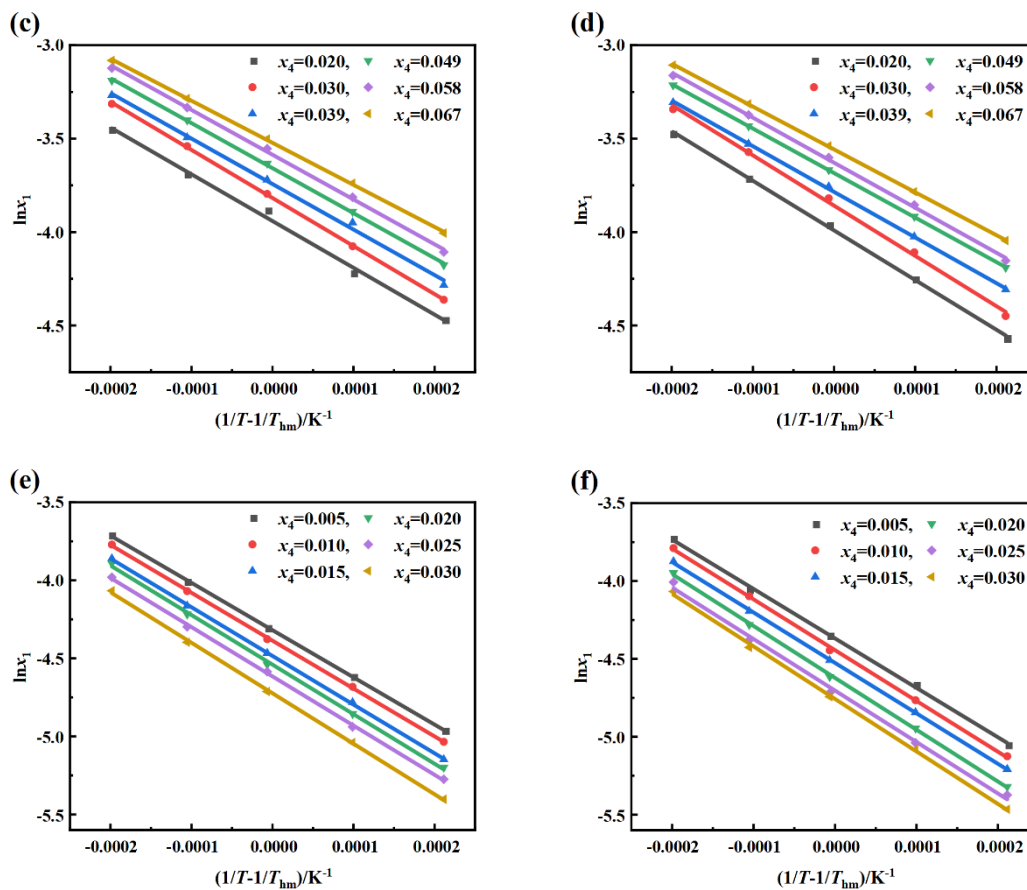

Fig. S5 van't Hoff plot of  $\ln x_1$  versus  $(1/T - 1/T_{hm})$  in mixed solvent: (a)  $\alpha$ -form in water-methanol solution ; (b)  $\gamma$ -form in methanol-water solution ; (c)  $\alpha$ -form in water-methanol- $NH_4Cl$  solution ; (d)  $\gamma$ -form in water-methanol- $NH_4Cl$  solution ; (e)  $\alpha$ -form in water-methanol-HMTA solution ; (f)  $\gamma$ -form in water-methanol-HMTA solution.
